# Supplementary material for: PTEN-regulated PI3K-p110 and AKT isoform plasticity controls metastatic prostate cancer progression
Source: PubMed Central journal article supplement (PMC10766561; doi:10.1038/s41388-023-02875-4), 2023-10-24
Supplement: 41388_2023_2875_MOESM7_ESM.pdf [file 41388_2023_2875_MOESM7_ESM.pdf]

**Supplementary Table S2: siRNA sequences and qPCR primers used in this study**

| Gene Target              | Sequence <sup>a</sup>                                                                     | Source                                  |
|--------------------------|-------------------------------------------------------------------------------------------|-----------------------------------------|
| AKT1 (human, mouse)      | S: 5'-CGCGUGACCAUGAACGAGUUU[dT][dT]-3'<br>AS: 5'-AAACUCGUUCAUGGUCACGCG[dT][dT]-3'         | Sigma-Aldrich                           |
| AKT2 (human)             | S: 5'-GACCCAACACCUUUGUCAUAC[dT][dT]-3'<br>AS: 5'-GUAUGACAAAGGUGUUGGGUC[dT][dT]-3'         | Sigma-Aldrich                           |
| Akt2 (mouse) #2          | S: 5'-GGGCCAAAGUGACCAUGAAUGACUU[dT][dT]-3'<br>AS: 5'-AAGUCAUUCAUGGUCACUUUGGCC[dT][dT]-3'  | Zhang <i>et al.</i> (84)                |
| Akt2 (mouse) #3          | S: 5'-CCACUGGCCGCUAUUAUGCCAUGAA[dT][dT]-3'<br>AS: 5'-UUCAUGGCAUAAUAGCGGCCAGUGG[dT][dT]-3' | Zhang <i>et al.</i> (84)                |
| AKT3 (human)             | S: 5'-CCAAAGCCAAACACAUUUUAUA[dT][dT]-3'<br>AS: 5'-UAUAAAUGUGUUUGGCUUUGG[dT][dT]-3'        | Sigma-Aldrich                           |
| SMAD4 (human, mouse) #96 | S: 5'-ACUGCUAAAUUCUAUGUUAAA[dT][dT]-3'<br>AS: 5'-UUUAACAUAAGAAUUUAGCAGU[dT][dT]-3'        | pGIPZ shRNA<br>V2LHS_37196 <sup>b</sup> |
| SMAD4 (human, mouse) #95 | S: 5'-GCGGUCUUUGUACAGAGUUAC[dT][dT]-3'<br>AS: 5'-GUAACUCUGAUCAAAGACCGC[dT][dT]-3'         | pGIPZ shRNA<br>V2LHS_37195              |
| Smad4 (mouse) #28        | S: 5'-GCAGACAGAAACUGGAUUAACUC[dT][dT]-3'<br>AS: 5'-GAGUUUAAUCCAGUUUCUGUCUGC[dT][dT]-3'    | Ding <i>et al.</i> (47)                 |
| Smad4 (mouse) #29        | S: 5'-CCUGAGUAUUGGUGUCCAUUCUC[dT][dT]-3'<br>AS: 5'-GAGAAUGGAACACCAUACUCAGG[dT][dT]-3'     | Ding <i>et al.</i> (47)                 |
| Negative Control         | S: 5'-AGUGUCCUUGCUGAACGAC[dT][dT]-3'<br>AS: 5'-GUCGUUCAGCAAGGACACU[dT][dT]-3'             | Sigma-Aldrich                           |
| b-actin (mouse)          | F: 5'-CAGCTGAGAGGGAAATCGTG-3'<br>R: 5'-CGTTGCCAATAGTGATGACC-3'                            | Havens <i>et al.</i> (51)               |
| Alu (human)              | F: 5'-CATGGTGAAACCCCGTCTCTA-3'<br>R: 5'-GCCTCAGCCTCCCGAGTAG-3'                            |                                         |

<sup>a</sup>, S- sense strand; AS- anti-sense strand; F- forward; R- reverse

<sup>b</sup>, siRNA sequence derived from Dharmacon shRNA clone.
